# Supplementary material for: City water stress and industrial water-saving potential in stringent management of China
Source: Research Square preprint supplement (doi:10.21203/rs.3.rs-114487/v1), 2021-08-19
Supplement: Supplementary file 1 [file 32357c4bc38cf5b3e7caed9d.pdf]

## Supplementary information - Appendix

### I.

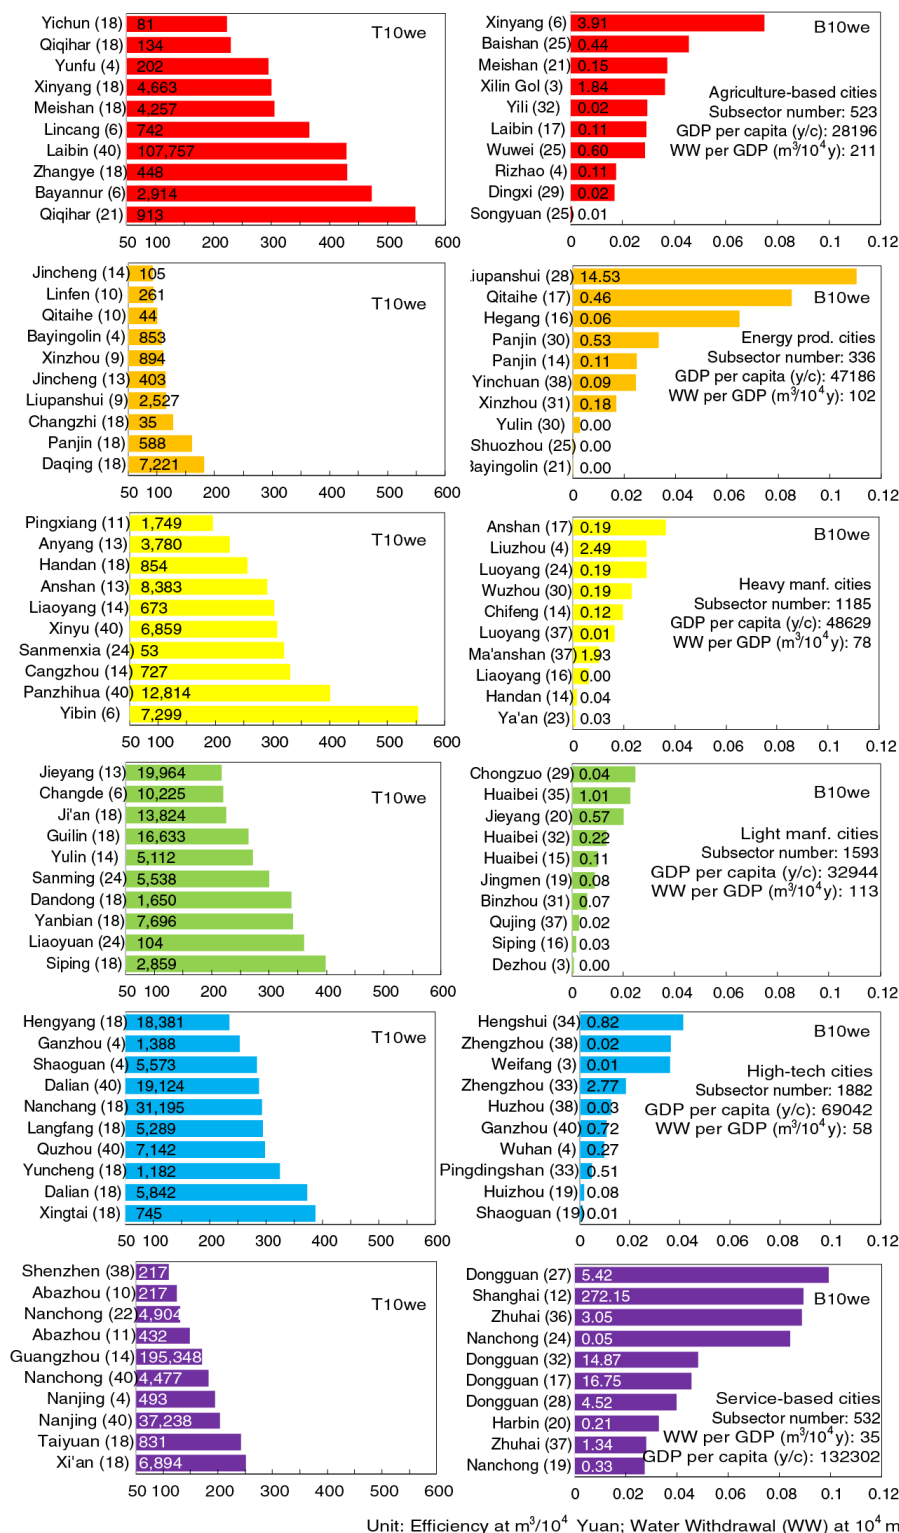

**Fig. 1.** Top-/bottom-ten sectors for water withdrawal efficiency (per industrial output) (T10we and B10we) and GDP statistics in each of six clusters. (Sectors were represented with codes in the parentheses near y-axis. Number on each bar shows water withdrawal (WW) of individual sector. For average GDP per capita and water withdrawal per GDP, we calculated the sum of the numerator and denominator respectively before division.)

## II.

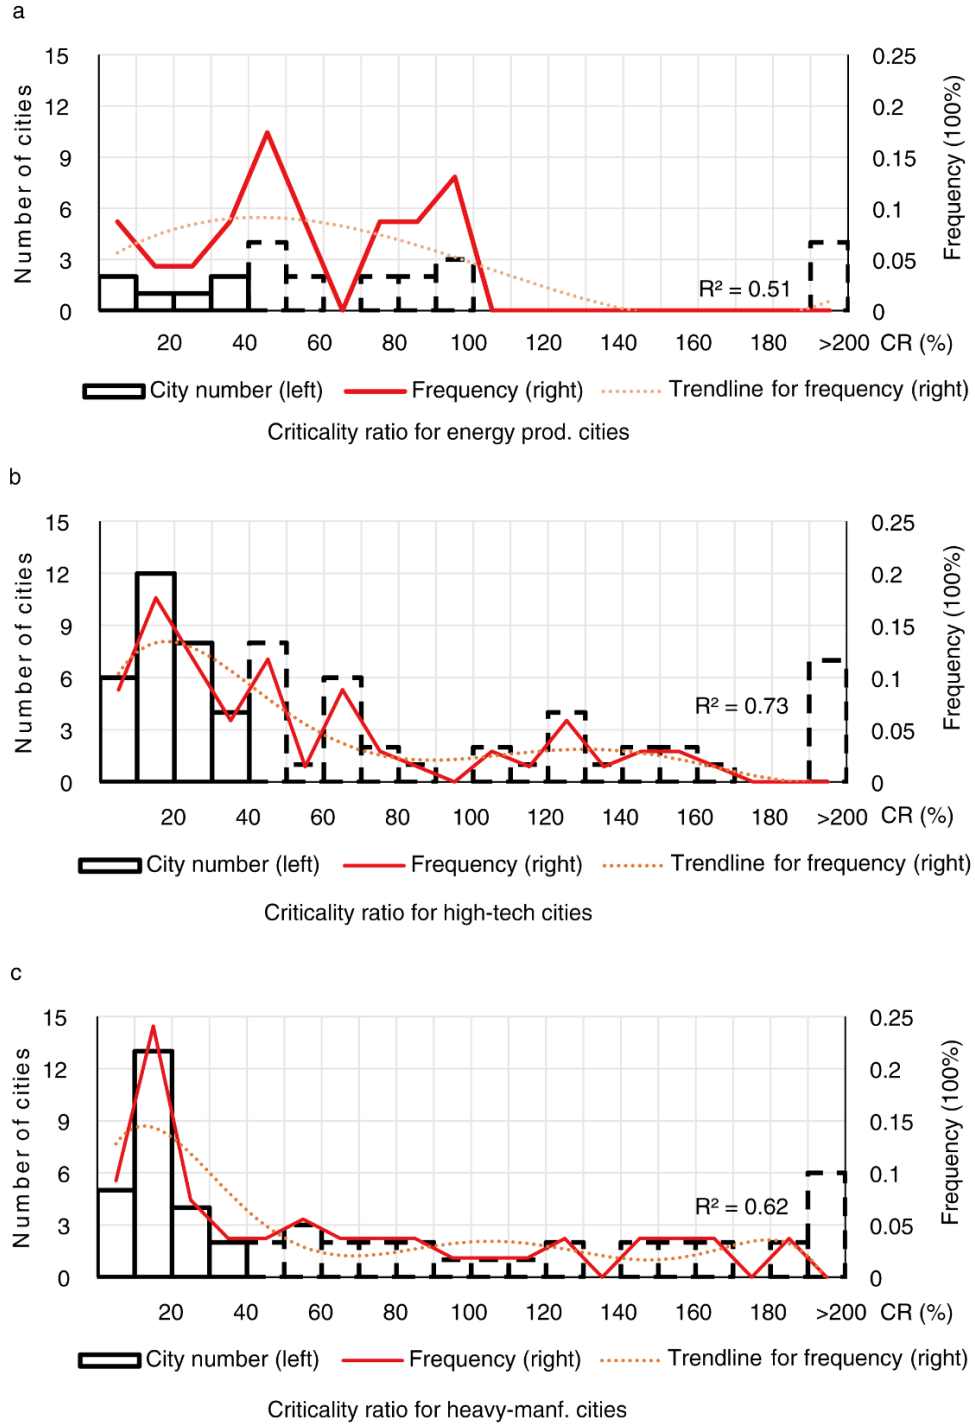

**Fig. 2.** Histograms showing frequency distribution of the criticality-ratio for three representative city clusters i.e. energy production, high-tech and heavy manufacturing types. (Criticality ratios above the 40% threshold are indicated by dashed squares; we merged >200% samples due to slightly lower frequencies.)

**III. Table 1** List of 43 sector classifications used in this study

| Code | Full name and description                                                             | Classification                 |
|------|---------------------------------------------------------------------------------------|--------------------------------|
| 1    | Farming, forestry, animal husbandry & fisheries                                       | Primary industry (Agriculture) |
| 2    | Coal mining & processing                                                              | Energy production industry     |
| 3    | Extraction, mining & processing of petroleum & natural gas                            | Energy production industry     |
| 4    | Ferrous metal ore mining & processing                                                 | Heavy industry                 |
| 5    | Nonferrous metal ore mining & processing                                              | Heavy industry                 |
| 6    | Nonmetal ore mining & processing                                                      | Heavy industry                 |
| 7    | Mining supporting activity                                                            | Heavy industry                 |
| 8    | Other mineral mining & processing                                                     | Heavy industry                 |
| 9    | Processing of food from agricultural product                                          | Light industry                 |
| 10   | Food manufacturing                                                                    | Light industry                 |
| 11   | Liquor, beverage, & refined tea manufacturing                                         | Light industry                 |
| 12   | Tobacco manufacturing                                                                 | Light industry                 |
| 13   | Cloth manufacturing (textile)                                                         | Light industry                 |
| 14   | Clothing manufacturing (apparel, footwear & hats)                                     | Light industry                 |
| 15   | Leather, fur, feather, & related product & footwear manufacturing                     | Light industry                 |
| 16   | Processing of timber, wood, bamboo, rattan, palm, & straw product                     | Light industry                 |
| 17   | Furniture manufacturing                                                               | Light industry                 |
| 18   | Papermaking & paper product manufacturing                                             | Light industry                 |
| 19   | Printing, reproduction of recording media                                             | Light industry                 |
| 20   | Culture, education, handicraft, fine art, sport & entertainment article manufacturing | Light industry                 |
| 21   | Processing of petroleum, coking, & nuclear fuel                                       | Energy production industry     |
| 22   | Chemical material & product manufacturing                                             | Heavy industry                 |
| 23   | Medicine manufacturing                                                                | Light industry                 |
| 24   | Chemical fiber manufacturing                                                          | Heavy industry                 |
| 25   | Rubber & plastics manufacturing                                                       | Heavy industry                 |
| 26   | Nonmetallic mineral product manufacturing                                             | Heavy industry                 |
| 27   | Smelting & pressing of ferrous metal                                                  | Heavy industry                 |
| 28   | Smelting & pressing of nonferrous metal                                               | Heavy industry                 |
| 29   | Metal product manufacturing                                                           | Heavy industry                 |
| 30   | General purpose machinery manufacturing                                               | Heavy industry                 |
| 31   | Special purpose machinery manufacturing                                               | Heavy industry                 |
| 32   | Automobile manufacturing                                                              | Heavy industry                 |
| 33   | Railway, ship, aerospace & other transportation equipment manufacturing               | Heavy industry                 |
| 34   | Electrical machinery & equipment manufacturing                                        | High-tech industry             |
| 35   | Communication equipment, computer, & other electronic equipment manufacturing         | High-tech industry             |

|    |                                                                                    |                            |
|----|------------------------------------------------------------------------------------|----------------------------|
| 36 | Measuring instrument & machinery for cultural activity & office work manufacturing | High-tech industry         |
| 37 | Other manufacturing                                                                | High-tech industry         |
| 38 | Comprehensive utilization of waste resource                                        | High-tech industry         |
| 39 | Repair of metal product, machinery & equipment                                     | High-tech industry         |
| 40 | Production & supply of electricity & hot water                                     | Energy production industry |
| 41 | Production & supply of gas                                                         | Energy production industry |
| 42 | Production & supply of tap water                                                   | Energy production industry |
| 43 | Service                                                                            | Tertiary industry          |

Notes: 2-8 are associated with mining and processing, 9-39 are manufacturing, and 40-42 are production and supply of electricity, gas and hot water. These were selected according to the widely used classification of national accounting system i. e. industrial classification for national economic activities, released by the National Administration for Quality Supervision, Inspection and Quarantine (AQSIQ-PRC 2016)<sup>1</sup>.

**IV. Table 2** List of cities with above-average water saving potential, as summarized in figure 4, which should be targeted in future water saving policy interventions.

| Sector                                    | City         | Province       | Cluster   | Criticality ratio (%) | Industrial output (Billion Yuan) | Water saving potential (10 <sup>4</sup> m <sup>3</sup> ) |
|-------------------------------------------|--------------|----------------|-----------|-----------------------|----------------------------------|----------------------------------------------------------|
| Cloth manufacturing                       | Bengbu       | Anhui          | light     | 60                    | 9                                | 2,755                                                    |
|                                           | Ma'anshan    | Anhui          | heavy     | 149                   | 1                                | 3,018                                                    |
|                                           | Foshan       | Guangdong      | high-tech | 107                   | 69                               | 4,014                                                    |
|                                           | Guangzhou    | Guangdong      | service   | 74                    | 28                               | 17,698                                                   |
|                                           | Shantou      | Guangdong      | light     | 58                    | 28                               | 9,007                                                    |
|                                           | Zhongshan    | Guangdong      | high-tech | 69                    | 17                               | 6,134                                                    |
|                                           | Shijiazhuang | Hebei          | high-tech | 400                   | 78                               | 14,207                                                   |
|                                           | Nanyang      | Henan          | light     | 60                    | 49                               | 5,871                                                    |
|                                           | Pingdingshan | Henan          | high-tech | 115                   | 8                                | 5,685                                                    |
|                                           | Zhoukou      | Henan          | light     | 93                    | 45                               | 3,127                                                    |
|                                           | Anyang       | Henan          | heavy     | 162                   | 4                                | 3,474                                                    |
|                                           | Huai'an      | Jiangsu        | high-tech | 62                    | 30                               | 10,944                                                   |
|                                           | Suzhou       | Jiangsu        | high-tech | 127                   | 136                              | 71,972                                                   |
|                                           | Anshan       | Liaoning       | heavy     | 57                    | 11                               | 7,859                                                    |
|                                           | Weifang      | Shandong       | high-tech | 122                   | 113                              | 2,938                                                    |
|                                           | Jiaxing      | Zhejiang       | high-tech | 49                    | 97                               | 3,830                                                    |
| Chemical material & product manufacturing | Xiangyang    | Hubei          | light     | 77                    | 38                               | 8,882                                                    |
|                                           | Xiangtan     | Hunan          | heavy     | 51                    | 13                               | 22,417                                                   |
|                                           | Liaoyuan     | Jilin          | light     | 80                    | 8                                | 3,096                                                    |
|                                           | Taizhou      | Jiangsu        | high-tech | 77                    | 133                              | 4,980                                                    |
|                                           | Tongliao     | Inner Mongolia | light     | 81                    | 19                               | 5,895                                                    |
| Electricity & hot water supply            | Hefei        | Anhui          | high-tech | 59                    | 40                               | 5,077                                                    |
|                                           | Liupanshui   | Guizhou        | energy    | 42                    | 16                               | 4,913                                                    |
|                                           | Nanjing      | Jiangsu        | service   | 87                    | 19                               | 29,417                                                   |

## References

1. Li, X. *et al.* City-level water-energy nexus in Beijing-Tianjin-Hebei region. *Appl. Energy* **235**, 827–834 (2019).
